# Supplementary material for: Dissecting the human BDNF locus: Bidirectional transcription, complex splicing, and multiple promoters
Source: PubMed Central journal article supplement (PMC2568880; doi:10.1016/j.ygeno.2007.05.004), 2007-09
Supplement: mmc4.pdf [file mmc4.pdf]

```

rat_BDNF      AG--AGGGTAAGAGTGGAGTAGAGACTAAGAGTTTAGGTGAGGATAGGGGTGGAGTTGGG 1636
mouse_BDNF    AG--AGGGTAAGAGTGGGTTAGAGACTAAGAGTTTAGGTGAGGATAGTGGTGGAGTTGGG 1627
              **      *****      ** * ** *      *****      * * * * *

human_BDNF    GGGGAGAGAAATAAGTCAGAAGTGCATATCACCGGT--AATGGGTAATCCTCTCGTAGAA 1702
rat_BDNF      GGAGAGAGGAATAAGTCAGAAGTGCCTATCTATAATGAAATGGGTAATGCTCTCATAACAT 1696
mouse_BDNF    GCGGAGAGGAATAAGTCAGAAGTGTCTATCTATAATGAAATGGGTAATGCTCGCATAACGT 1687
              **      *****      *****      *      *****      * * *

human_BDNF    GAAAAGGTTCTCATCAACATGTGATCAACTATTAACAGGATGGCTTTGGCAAAGCCATCC 1762
rat_BDNF      GGAAAGGTTCTCATCAACATGTGATCAACTATTAACAGGATGGCTTTGGCAAAGCCATCC 1756
mouse_BDNF    GGAAAGGTTCTCATCAACATGTGATCAACTATTAACAGGATGGCTTTGGCAAAGCCATCC 1747
              *      *****      *****

              ▼          ▼▼
human_BDNF    GCACGTGACAAAACCGTAAGGAAGTGAAGAAACCGTCTAGAGCAATATCAAGTATCACTT 1822
rat_BDNF      GCACGTGACAAAACGTAAGGAAGTGAAGAAACCGTCTAGAGCAATATCAAGTACCCTT 1816
mouse_BDNF    ACACGTGACAAAACGTAAGGAAGTGAAGAAACCGTCTAGAGCAATATCAAGTACCCTT 1807
              *****      *****      *****

              ▼          ▼          ▼
human_BDNF    AATTAGAGA---TTTTTAAGCCTTTTCCCTCCTGCTGTGCCGGGTGTGTAATCCGGGCGA 1878
rat_BDNF      AATTAGAGAATATTTTTTTTAACTTTTCCCTCCTGCTGCGCCGGGTGTGTGATCCGGGCGA 1876
mouse_BDNF    AATTAGAGAATATTTTTTTTAACTTTTCCCTCCTGCTGCGCCGGGTGTGTGATCCCGGAGA 1867
              *****      ***** *      *****      * *      *****      * * *

human_BDNF    TAGGAGTCCATTAGCACCTTGGACAGAGCCAAACGGATTTGTCCGAGGTGGCGGTACCC 1938
rat_BDNF      GCAGAGTCCATTAGCACCTTGGACAGAGCCAGCGGATTTGTCCGAGGTGGTAGTACTTC 1936
mouse_BDNF    GCAGAGTCCATTAGCACCTTGGACAGAGCCAGCGGATTTGTCCGAGGTGGTAGTACTTC 1927
              *****      *****      *****      *****

human_BDNF    CAGTGTAGTCTTCTTGGCCCCGCTGTAAAGCCAACCCCTGTGTGCGCCCTTAAAAAGCGTCTT 1998
rat_BDNF      ATCCAGTGTATCTTTTCCCTCGCTGTCAAGCCAACCCGGTGTGCGCCCTTAAAAAGCGTCTT 1996
mouse_BDNF    ATCCAGTGTATCTTTTCCCTCGCTGTCAAGCCAACCCGGTGTGCGCCCTTAAAAAGCGTCTT 1987
              **      *****      *      *****      *****      *****

              ▼▼○○          ▼          ▼          ○○
human_BDNF    TTCTGAGGTTCCGGCTCACACTGAGATCGGGGCTGGAGAGAGAGTCAAGTATTTGGAGCGGA 2058
rat_BDNF      TTCCGAGGTTCCGGCTCACACTGAGATCGGGGCTGGAGAGAGAGTCAAGTATTTGGAGCGGA 2056
mouse_BDNF    TTCCGAGGTTCCGGCTCACACTGAGATCGGGGCTGGAGAGAGAGTCAAGTATTTGGAGCGGA 2047
              ***      *****      *****      *****

human_BDNF    GCGTTTGGAAAGCGAGCCCCAGTTTGGTCCCCTCATTGAGCTCGCTGAAGTTGGCTTCCCT 2118
rat_BDNF      GCGTTTGGAGAGCCAGCCCCAGTTTGGTCCCCTCATTGAGCTCGCTGAAGTTGGCTTCCCT 2116
mouse_BDNF    GCGTTTGGAGAGCGAGCCCCAGTTTGGTCCCCTCATTGAGCTCGCTGAAGTTGGCTTCCCT 2107
              *****      * *      *****      *****

              ▼
human_BDNF    AGCGGTGTAGGCTGGAATAGACTCTTGGCAAGCTCCGGTGTGGTATACTGGGTAACTTT 2178
rat_BDNF      AGCGGTGTAGGCTGGAATAGACTCTTGGCAAGCTCCGGTGTGGTATACTGGGTAACTTT 2176
mouse_BDNF    AGCGGTGTAGGCTGGAATAGACTCTTGGCAAGCTCCGGTGTGGTATACTGGGTAACTTT 2167
              *****      *****      *****

              ▼
human_BDNF    GGGAAATGCAAGTGTATTATCTCCAGGATCTAGCCACCGGGTGGTGTAAAGCCGAAAGAA 2238
rat_BDNF      GGGAAATGCAAGTGTATTATCTCCAGGATCTAGCCACCGGGTGGTGTAAAGCCGAAAGAA 2236
mouse_BDNF    GGGAAATGCAAGTGTATTATCTCCAGGATCTAGCCACCGGGTGGTGTAAAGCCGAAAGAA 2227
              *****      *****      *****

human_BDNF    GFTAAAGCACCAGGGCGGGGACCCCTTGCATCCCCAATTCTTGAGCTATTTTGATACT--G 2296
rat_BDNF      GFTAAAGCACCAGGGCGGGGACCC--TGCATCCCCAATTCTTGAGCTATTTTGATACTCGA 2294
mouse_BDNF    GFTAAAGCACCAGGGCGGGGACCC--TGCATCCCCAATTCTTGAGCTATTTTGATACTCGA 2285
              *****      *****      *****

human_BDNF    TCTTCCGGAGAGGACGCGTGGTGGAGGGGAGGAGGTAGAGGGAGAGCATGAGAGGGGGTT 2356
rat_BDNF      TCTTCCGAAAGGACGCGTAGTGGAGCGGAGGAAGTGGAGGGGAGAGCCTGAGAAATGGTT 2354
mouse_BDNF    TCTTCCGAAAGGACGCGTAGTGGAGAGGAGGAAGTGGAGAGAGAGCATGAGAAATGGTT 2345
              *****      *****      *****      *****      *****      *****

human_BDNF    GTTCTTGGTATTTGCCAGTTTGAATTGCCCTAGGTGAGAACCCTGGGGCAAAGGGAGA 2416
rat_BDNF      GTTCTTGGTATTTGTCTAGTTTAAATTGACCTAGGTGAGAACC--TGGGGCAAATCGAGG 2413
mouse_BDNF    GTTCTTGGTATTTGGCTAGTTTAAATTGACCTAGGTGAGAACC--TGGGGCAAATCGAGG 2404
              *****      *      *****      *****      *****      * *

```

**EXON II**



mouse\_BDNF GAAGAG 3135  
\*\*\*\*\*

< ~ 17,5 kb >

human\_BDNF ---CCCCACCTCGAATCACCTACCCCACTCTGGTTAAAGCAGAAGACTTTTT----- 51  
rat\_BDNF CAACCCACCCACCCCTCACC---CTAAATTTGGTTAAAGATTTAAAAA----- 51  
mouse\_BDNF -----ACCCACCCCTCACC---CTAAATCCTGGTTAAGTATATATACATATATATATT 50  
\*\*\*\*\* \* \*\*\*\*\* \* \* \*\*\*\*\* \* \*

human\_BDNF -ATTTATCTTGGCTGCCCTGGTTCTGTTATTTAAAGGGTTAGCTTATACGTGTGTTTGCTG 110  
rat\_BDNF -ATGTGTTGTGCTGCC-TAGATGATGAAAGGTTTGGCTTCTGTGTGCGTGAGTTGCTA 109  
mouse\_BDNF GATGTGTTGTGCTGCC-TAGATAATGACAGGCTTGGCTTCTGTGTGCGTGAATTTGCTA 109  
\* \* \* \* \* \*\*\*\*\* \* \* \* \* \* \* \* \* \* \* \* \* \* \* \* \* \* \* \* \* \*

human\_BDNF GGGCTGGAAGTGAAAACATCTGCAAAGCATGCAATGCCCTGGAACGGAACTCTTCTAAT 170  
rat\_BDNF GGACTGGAAGTGAAAACGTCTACAAA-GCATGCAATGCCCTGGAACGGAATTTCTTCTAAT 168  
mouse\_BDNF GGACTGGAAGTGAAAACATCTACAAA-GCATGCAATGCCCTGGAACGGAATTTCTTCTAAT 168  
\* \* \*\*\*\*\* \* \* \* \* \* \* \* \* \* \* \* \* \* \* \* \* \* \* \* \* \*

human\_BDNF AAAAGATGTATCATTTTAAATGCGCTGAATTTTGATTCTGGTAATTCGTGCACTAGAGTG 230  
rat\_BDNF AAAAGATGTATCATTTTAAATGCGCGGAATTCGATTCTGGTAATTCGTGCACTAGAGTG 228  
mouse\_BDNF AAAAGATGTATCATTTTAAATGCGCGGAATTCGATTCTGGTAATTCGTGCACTAGAGTG 228  
\*\*\*\*\* \* \* \* \* \* \* \* \* \* \* \* \* \* \* \* \* \* \* \* \* \*

human\_BDNF TCTATTTTCAGAGGCAGCGGAGGTATCATATGACAGCGCACGTC AAGGCACCGTGAGGCC 290  
rat\_BDNF TCTATTTTC-GAGGCAGAGGAGGTATCATATGACAGCTCACGTC AAGGCAGCGTGAGGCC 287  
mouse\_BDNF TCTATTTTC-GAGGCAGAGGAGGTATCATATGACAGCTCACGTC AAGGCAGCGTGAGGCC 287  
\*\*\*\*\* \* \* \* \* \* \* \* \* \* \* \* \* \* \* \* \* \* \* \* \* \*

▼○ ▼○ ○ ○

human\_BDNF TCTCGTGGACTCCCACCCACTTTCCATTCCACCGGAGAGGGCTGCTCTCGCTGCCGCT 350  
rat\_BDNF TCTCGTGGACTCCCACCCACTTTCCATTCCACCGAGGAGGACTGCTCTCGCTGCCGCT 347  
mouse\_BDNF TCTCGTGGACTCCCACCCACTTTCCATTCCACCGAGGAGGACTGCTCTCGCTGCCGCT 347  
\*\*\*\*\* \* \* \* \* \* \* \* \* \* \* \* \* \* \* \* \* \* \* \* \* \*

○ ○ ○○○ ○○○

human\_BDNF C-----CCCCCGGCAACTAGCATGAAATCTCCCTGCCCTCTGCCGAGATCAAATG 400  
rat\_BDNF CCCCCACCACCCCGGCGAGCTAGCATGAAATCTCCAGTCTCTGCCTAGATCAAATG 407  
mouse\_BDNF CCCCCACCACCCCGGCGAGCTAGCATGAAATCTCCAGCCTCTGCCTAGATCAAATG 407  
\* \*\*\*\*\* \* \* \* \* \* \* \* \* \* \* \* \* \* \* \* \* \* \* \* \* \*

▼

human\_BDNF GAGCTTCTCGCTGATGGGGTGCAGATTACCTCCGCCATGCAATTTCCACTATCAATAA 460  
rat\_BDNF GAGCTTCTCACTGAAGGCGTGCAGATTACCTCCGCCATGCAATTTCCACTATCAATAA 467  
mouse\_BDNF GAGCTTCTCGCTGAAGGCGTGCAGATTACCTCCGCCATGCAATTTCCACTATCAATAA 467  
\*\*\*\*\* \* \* \* \* \* \* \* \* \* \* \* \* \* \* \* \* \* \* \* \* \*

human\_BDNF TTTAACTTCTTTGCTGCAGAACAGAAGGAGTACATACCGGCACCAAAGACTCGCGCCCC 520  
rat\_BDNF TTTAACTTCTTTGCTGAAGAACAG---GAGTACATATCGGCCACCAAAGACTCGC-CCCC 523  
mouse\_BDNF TTTAACTTCTTTGCTGCAGAACAG---GAGTACATATCGGCCACCAAAGACTCGC-CCCC 523  
\*\*\*\*\* \* \* \* \* \* \* \* \* \* \* \* \* \* \* \* \* \* \* \* \* \*

human\_BDNF CTCCCCCTTTAATT-AAGCGAAGGGAACGTGAAAAATAATAGAGTGTGGGAGTTTGG 579  
rat\_BDNF CTCCCCCTTTAACTGAAGAGAAGGGGAAAT-ATATAGTAA--GAGTCTAGAACCTTGGG 580  
mouse\_BDNF -TCCCCCTTTAACTGAAGAGAAGGGGAAAT-ATATAGTAA--GAGTCTAGAACCTTGGG 579  
\*\*\*\*\* \* \* \* \* \* \* \* \* \* \* \* \* \* \* \* \* \* \* \* \* \*

human\_BDNF GGCCGAAGTCTTTCCCGGAGCAGCTGCCCTTGATGGTTACTTTGACAAGTAGTGACTGAAA 639  
rat\_BDNF GACCG--GTCTTCCCAGAGCAGCTGCCCTTGATGTTTACTTTGACAAGTAGTGACTGAAA 638  
mouse\_BDNF GACCG--GTCTTCCCAGAGCAGCTGCCCTTGATGTTTACTTTGACAAGTAGTGACTGAAA 637  
\* \* \* \* \* \* \* \* \* \* \* \* \* \* \* \* \* \* \* \* \* \* \* \* \* \* \*

human\_BDNF A-GTGGGTTTGTCTTTCTTTCTTTCTTTT-CCGTTTTTTCTGT-----TTGGTTCGGCT 691  
rat\_BDNF AAGTGGGTTTCTTTCTTTCTTTCTTTCTTTTCCACCCCGCCCGC-----TTGGTCTGCT 693  
mouse\_BDNF AAGTGGGTTTCTTTCTTTCTTTCTTTCTTTTCCACCCCGCCCGC-----TTGGTCTGCT 697  
\* \* \* \* \* \* \* \* \* \* \* \* \* \* \* \* \* \* \* \* \* \* \* \* \* \* \*

human\_BDNF AGAAAGCGTGTGGCTTTAGCAGGCTGTGTCATTGCCTGGGCTTCCTGGCTGGAACAAGTA 751  
rat\_BDNF GGGAAGCATATGGCTTTAGTGAGGCTGTACTGCCTAGGCTTCCCGGCTAGAAGCGGTA 753

EXON IV









```

mouse_BDNF      GTGGTGTGTGTCGCTGCGCCTCAGTGGAGCCGAACAAACTGATGCTGAAAATGGTGTGCG 353
                *** ** * * * * * * * * * * * * * * * * * * * * * * * * * * * * * *
human_BDNF      TAAAGTTGAGTAACAGAGAGCTAATAGCCTTCTCTTGCTAATTTATCTTT-----CCCC 414
rat_BDNF        TAAAGTTGAGCAACAAAGAAGTAACTAGTAACCTTCTCTTGCTAATTTATCCCCCTCCACCCT 411
mouse_BDNF      TAAAGTTGAGCAACAAAGAAGTAACTAATACCTTCTCTTGCTAATTTATCTCCTCCAACCCT 413
                ***** * * * * * * * * * * * * * * * * * * * * * * * * * * * * * *

human_BDNF      CAAGATTTCTTGATAATAGTTTGAAGGAGTGTATTCTTTGGTCTCTAGAGGCAACTT 474
rat_BDNF        CAGGACATCGTGAGAGTAATTTGAAAAGGATGTTGTTCTTCTGTTGCCAGGGGCAACTC 471
mouse_BDNF      -GGGACATCGTGATAGTAATTTGAAAAGGAATGTTGTTCTTCTGTTGCTAGGACAACCT 472
                * * * * * * * * * * * * * * * * * * * * * * * * * * * * * *

human_BDNF      ACCTT 479
rat_BDNF        ATCTT 476
mouse_BDNF      ATCTT 477
                * * *

```

< ~ 13,5 kb >

```

human_BDNF      GTGCAATCTAAGCAGTTCCTAAGCAT--GTTTGTATTTCGTGCAAAG-TGAGAGTAAATCT 57
rat_BDNF        GGATCATTTGCTGTCTTCTCGTTGATTGGCTACCCCTACCGTCCAAG-CAGTTCTGAGTAT 59
mouse_BDNF      CTCTTACTGTGGCTGATGTGTGGA--GGCTGTCACATATACGAAGTCGGAACTGTTGT 58
                * * * * * * * * * * * * * * * * * * * * * * * * * * * * * *

```

```

human_BDNF      AAAAGAAATTTTTTGTGT-----GTTTACGGATGGTAATAAAGTCTCTTAGTGGTTGA 111
rat_BDNF        GTTTACCATTATGCAAAGTGAAG-GTGATACATGAGGAAATTTCCATTG-GTGGTAGA 117
mouse_BDNF      GTGCATTGCTCTCTGAGGGGAAGAGTCTCAAGATAATGGTGATGCCACTGTAGAATTGG 118
                * * * * * * * * * * * * * * * * * * * * * * * * * * * * * *

```

```

human_BDNF      AAATGTTATTTCTTACAAAAGTGGAGAACATTTGCTTTTCAATACCAGAGTTTTCAGCCA 171
rat_BDNF        CTACCTTGTCTCTTTCAAAGTGGATGATAGAACTTTGATTTTCAATACTAA-AGCTT 176
mouse_BDNF      AGAGAGCTTTAATGTCCCCTTTGGCAAGAATTTCCATAGCTTGT-GTTGCCGA-AGCTG 176
                * * * * * * * * * * * * * * * * * * * * * * * * * * * * * *

```

```

human_BDNF      TTTCTGCATTCTGACCTATTG-ACTGGAGTTAGGTTGCCTTTGAATTCAGTAAAACCTTCA 230
rat_BDNF        TCGGCCATTTCTGCACTATTG-ACTGGAGTAGGTTATTTTTGTGTTTCAGCAACTCATCG 235
mouse_BDNF      TCTGTGCACTGTGCCCTATTTCACTGGAGGTAGGTTGTTCTTGTGTTTCAGCATCTCATTG 236
                * * * * * * * * * * * * * * * * * * * * * * * * * * * * * *

```

```

human_BDNF      TGGGCAGAAACACAGTTCCTTTTCTACTTATTGGATATCATGATGGCCATTGCATGTA 290
rat_BDNF        TGGACAGAAACATAATTTCTTTT-CTGGTGGACTTACCCTGCATAATGAGTGTGTGCGTG 294
mouse_BDNF      TGAGCAGAAACATGCTTCTTT--CTGGTGGACTTACCCTGCATAATGAATGCTGAGTGTG 294
                ** * * * * * * * * * * * * * * * * * * * * * * * * * * * * * *

```

```

human_BDNF      TGTGTCTTTTTGTAAGTCCATGCCTCAGAAGTGAAGTAGGAATAAAATTAGG--GTCA 348
rat_BDNF        TATGTCTTT--ACGAGTCTATGTTCCACAGCTGATAAGTAGAAAGAAAGTTAGCACGGTA 352
mouse_BDNF      TATGTCTTT--ACAAGTCTATGTTCCACAGCCAATAAGTAGAAAGAAAGTTAGCCTATTA 352
                * * * * * * * * * * * * * * * * * * * * * * * * * * * * * *

```

```

human_BDNF      GGGCT--GGGATGCTACTCTTTGCTGCTGAGAAACACAATGCTTCAGGTAAGTGATTCT 406
rat_BDNF        GAGTTAAAGGAATTCTACTTGTACTACTAAGAGGCACAATGCTTCCGGTAAGTAATCA 412
mouse_BDNF      GAGTTAAAGAGATGCTACTCGTTACTACTAAGAGGCAGAATGCTTCCGGTAAGTAATCA 412
                * * * * * * * * * * * * * * * * * * * * * * * * * * * * * *

```

```

human_BDNF      GAAGTCTTCCACCACCTGACGGTAACCTTGGGTTGGTCCATAGGTATGTTTTCATTTTGC 466
rat_BDNF        GAAGTCTTCCACCACCTGACG-TAACCTTGGTTTGGTCCATAGGTATGCTTAAATTTTGC 471
mouse_BDNF      GAAGTCTTCCACCACCTGATG-TAAGCTTGGTTTGGTCCATAGGTATGTTCAATTTTGC 471
                ***** * * * * * * * * * * * * * * * * * * * * * * * * * * * * * *

```

```

human_BDNF      TTGTTTCATCCATTTTAAATTGGCTTCTAGAGCATGCTTGTAGATGTAGAGCCAAATTTAG 526
rat_BDNF        TTCTTATTTCAATTTTGTGGTTTGCAGAGCGTGCTTAAAGATGCA-AGCCAAATTC-- 528
mouse_BDNF      TTGTTTATTTCAATTTTGTGGTTTGCAGAGTATGCTTATAGATGCA-AGCCAAATTC-- 527
                ** * * * * * * * * * * * * * * * * * * * * * * * * * * * * * *

```

EXON VIIIh

|            |                                                                      |      |
|------------|----------------------------------------------------------------------|------|
| human_BDNF | <u>AGTAGAGCAACCCCTCTGGCAAACAGGAAGAGATTAATTTTGTGGTATGCTTTTAAGGGAC</u> | 586  |
| rat_BDNF   | -----TAAGAGTGATTTAACTTTGTGGTATGTTGTTAAGAGGC                          | 566  |
| mouse_BDNF | -----TAACTTTGAGGTATGTTATTAAGTGAC                                     | 554  |
|            | *** ** * * * * * * * * * * * * * * * * * *                           |      |
| human_BDNF | <u>TTCCAGGAACTTCAAAGCAGAAAAAGAAGCACTAGCTGCCTATTCCAAAATGTGTAA</u>     | 646  |
| rat_BDNF   | ATCATAGGGAACCTCAAATGCACAGAAAGAAACCCTAGCTGCCAGTTCCAAAGTGTGTAA         | 626  |
| mouse_BDNF | TCTGTAGGAAAGTTCAAATGCACAGAAAGAAGTACTAGATGCCAATTCAAAGCGTGTAA          | 614  |
|            | *** * * * * * * * * * * * * * * * * * * * * * * *                    |      |
|            | ▼                                                                    |      |
| human_BDNF | <u>AACACCCTCAGCTTTTTTAAAAGTAGGATAAACTCAGAG--CGGACACACACACACACA</u>   | 703  |
| rat_BDNF   | AATACTACTCAGCTTTGTAAAGGTATGACAA-CTCAGTGTTACACACACGCGCGCGTGCA         | 685  |
| mouse_BDNF | AGTACTACTCAGCTTTGTAAAGGTATGACAA-CTCAGTGTTACACACACACACACACACA         | 673  |
|            | * ** * * * * * * * * * * * * * * * * * * * * * *                     |      |
| human_BDNF | <u>CACACACAGAGAGA-ACATCTCTAGTAAAAAGAAAAGTTGAGCTTCTTAGCTAGATGTG</u>   | 762  |
| rat_BDNF   | CACACACACACACACACA-----GGAGTTCTGCTAATGAGAAGT-                        | 724  |
| mouse_BDNF | CACACACACACACACACACACACTTGAGAAGGGGGTGGAGTTCTGCTAATGAGAAGC-           | 732  |
|            | ***** * * * * * * * * * * * * * * * * * * * *                        |      |
| human_BDNF | <u>TGTATTAGCCAGAAAAGCCAAAGGAGTGAAGGGTTTTAGAGAAGCTGGAGGAGA-TAAAGT</u> | 821  |
| rat_BDNF   | TGCGCTCTCTTTGGTTTGCCAAAAC----AAGCCATCCAAGTACCATGGGAGTCTGGAGA         | 780  |
| mouse_BDNF | TGAGCTCTCTGTGGTTTGCCAAAAC----AAGCCATCAAAGTGCCTCTGAGTCTGGAGA          | 788  |
|            | ** * * * * * * * * * * * * * * * * * * * * * * *                     |      |
| human_BDNF | <u>GGAGTCTGCATATGGGAGGCATTTGAA--ATGGACTTAAATGTCTTTTTAATGCTGACT</u>   | 878  |
| rat_BDNF   | GATGTCCGCACGTGAAAGGCATTGATTGATCCGGACTTGAATGCCTTTCCT-TGAGGACT         | 839  |
| mouse_BDNF | GATGTCTGCTCGTGAAGGCATTGAT----CCTGACTTGAATGCCTTTCCT-TGAGGACT          | 843  |
|            | * *** ** * * * * * * * * * * * * * * * * * * * *                     |      |
| human_BDNF | <u>TTTTAGTTTTCTCCTTACCAGACACATTGTTTTTCATGACATTAGCCCCAGGCATAGACA</u>  | 938  |
| rat_BDNF   | AGTCCAGCTTTCCC-CTTTCT--CTT-----GTTTTCATACCTGCCTCAGGCA                | 884  |
| mouse_BDNF | GTTCCAGCTTTCAGCTTTCT--CTTAAAGATACATTGTTTTTCATCCCTGCCTCAGGCA          | 901  |
|            | * *** * * * * * * * * * * * * * * * * * * * * * *                    |      |
| human_BDNF | <u>CATCATTAAATGAACATGTCAAAAAATGATTCTGTTTAGAAATAAGCAAAACATTTTC</u>    | 998  |
| rat_BDNF   | CATCATTAGAACAAACCTACTGAAAACGAATT--GTTTGAAATAAGCAAAACCTTCTC           | 941  |
| mouse_BDNF | TGTCATTAGAACAAACCTATTGAAAATGAATT--GTTTGAAATAAGCAAAACCTTCAC           | 958  |
|            | ***** ** * * * * * * * * * * * * * * * * * * * *                     |      |
| human_BDNF | <u>AGTTGTGACCACCAGGTGTAGAATAAAGAACAGTGAATTGGGAGCCCTGAGTTCTAAC</u>    | 1058 |
| rat_BDNF   | AGATGCAGT-----AAAAC-CTAGAGATGTGCTCTCT-AGTTCC---                      | 978  |
| mouse_BDNF | AGATGTAGT-----AAAACGTTGGAGATGGGATCTCT-AGTTCC---                      | 996  |
|            | ** ** * * * * * * * * * * * * * * * * * * * * * *                    |      |
| human_BDNF | <u>ATAAAGTTTCTTCATGACATAAGGCAAGTCTCTATGGCCTTTGGTTTCCTTACCTGTAA</u>   | 1118 |
| rat_BDNF   | -TAAAGTTTCTTCATGACACCAGACAAATCCTGTTTGCCCTTTAGCTTCCCTATCTGAAA         | 1037 |
| mouse_BDNF | -TTAAGTTTCTTCATGAGACCGGGCAAGTCTCTGTGTGGCCTTTTGGTTCTTATCCGCAA         | 1055 |
|            | * * * * * * * * * * * * * * * * * * * * * * * * * *                  |      |
| human_BDNF | <u>AACAGGATGGCTCAATGAAATTATCTTTCTTTGCTATAATAGAGTATCTCTGTGGGA</u>     | 1178 |
| rat_BDNF   | AACACCGTGGTCCGAA-----GTGCTGTCACTG-----CCTCTAGGGAG                    | 1078 |
| mouse_BDNF | AACATGGTGGTCTACA-----TCGCTCTAGGAGAAAAGGCCCTCCAGCAT                   | 1104 |
|            | **** * * * * * * * * * * * * * * * * * * * *                         |      |
| human_BDNF | <u>AGAGGAAAAAAAAGTCAATTTAAAGGCTCCTTATAGTTCCCAACTGCTGTTTTATTGT</u>    | 1238 |
| rat_BDNF   | AAAGG-----CCCGTCCCAGCT-----                                          | 1095 |
| mouse_BDNF | TCCGG-----CCGACCGCTGTTTTATCAT                                        | 1128 |
|            | ** * * * * * * * * * * * * * * * * * * * * * * *                     |      |
|            | ○                                                                    |      |
| human_BDNF | <u>GCTATTTCATGCCTAGACATCACATAGCTAGAAAGGCCATCAGACCCCTCAGGCCACTGC</u>  | 1298 |
| rat_BDNF   | ----CTCCTGCTCAGA-----GCTGCAGCCAGCCGGC-----CCTCTAGCCACTAC             | 1137 |
| mouse_BDNF | ACTGCTCCTGCTCAGACTGCTTAGAGCACCAGACCCAGC-----CCTCTAGCCACTAC           | 1183 |
|            | ** ** * * * * * * * * * * * * * * * * * * * * * *                    |      |
| human_BDNF | <u>TGTTCTGTACACATTCTGCAAAGGACCATGTTGCTAACTTGAAAAAATTACTATTA</u>      | 1358 |
| rat_BDNF   | TGTTTCCACCACACATTCTTACCAAGGACTGTGCTGCTGACTTGAAAGGAAG-ATTACTA         | 1196 |
| mouse_BDNF | CGTTTCCATCACACATTCTTCCCAAGGACTATGCTGCTGACTTGAAAGGAAG-ATTACTA         | 1242 |

```

*** * ***** * ***** * ***** * ***** * ***** * ***** * *****
O
human_BDNF ATTACACTTGCAGTTGTTGCTTAGTAACATTTATGATTTTGTGTTTCTCGTGACGCATG 1418
rat_BDNF -TTCCACTTGCAGTTGTTGCTTAGTAACATGTTGATT--GTGTTTCTGGTGACGGCGTG 1253
mouse_BDNF -TTCCACTTGCAGTTGTTGCTTAGTAACATTTGTTGATT--GTGTTTCTGGTGACAGCGTG 1299
* * * * * * * * * * * * * * * * * * * * * * * * * * * * * * * * * * * * * * * *

human_BDNF AGCAGAGATCATTAAAAATTAACCTTACAAAGCTGCTAAAGTGGGAAGAAGGAGAACTT- 1477
rat_BDNF AACAGAGATCATTAAAAATTAACCCCCAGAGCTGCTAAAGTGGGAGGAAGTGGGAGCGG 1313
mouse_BDNF TGCAGAGATCATTAAAAATTAACCCCAAGCTGCTAAAGCGGGAGGAAGTGGGAGCAG 1359
* * * * * * * * * * * * * * * * * * * * * * * * * * * * * * * * * * * * * * * *

human_BDNF -GAAGCCACAATTTTGCACCTGCTTAGAAGCCATCTAATCTCAGC-TTATATGCTAGAT 1535
rat_BDNF GGAAGCCACAGTGCCGTCACCTGCTTAGAAAACCGTTTACTCTCAGGCTTACATG-TAAAT 1372
mouse_BDNF GGAAGCCACAGTGTTTCACTTCTGCTTAGAAAACCGTTTACTCTCAGGCTTACATG-TAAAT 1418
* * * * * * * * * * * * * * * * * * * * * * * * * * * * * * * * * * * * * * * *

human_BDNF CTTGGGGGCAAACACTGCATGTCTCTGGTTTATATTAACCACATACAGCACACTA-CTG 1594
rat_BDNF CTTGAGGA-AAACACTGCATGTCTCTGGTTTATATTAAGCTACATACAGCACGGTAACTG 1431
mouse_BDNF CTTGGGGA-AAACATTGCATGTCTCTGGTTTATATTAAGCCACATACAGCACAGTAACTG 1477
* * * * * * * * * * * * * * * * * * * * * * * * * * * * * * * * * * * * * * * *

human_BDNF ACACTGATTTGTGCTGGTGCAGCTGGAGTTTATCACCAGACAT-----AAA 1642
rat_BDNF ACATTGATTTGTGTCCTTGCAGCTGGAGTGGATCAGTAAGACATTAAAAAAAAGAAA 1491
mouse_BDNF ACATTGATTTGTGTCCTTGCAGCTGGAGTGGATCAGTAAGACA-----AAA 1524
* * * * * * * * * * * * * * * * * * * * * * * * * * * * * * * * * * * * * * * *

human_BDNF AAAACCTTGACCCTGCAGAATGGCCTGGAATTACAATCAGATGGGCCACATGGCATCCCG 1702
rat_BDNF AAGAAAAAAGAAAGAAAAAGGTCTGAAATTACAAGCAGATGGGCCACATGGTGTCCCC 1551
mouse_BDNF AAAAAAAGAAAGAAAAAGGTCTGAAATTACAAGCAGATGGGCCACATGCTGTCCCC 1584
* * * * * * * * * * * * * * * * * * * * * * * * * * * * * * * * * * * * * * * *

human_BDNF GTGAAAGAAAGCCCTAACCAAGTTTCTGTCTTGTCTTCTGCTTCTCCCTACAGCTCCACC 1762
rat_BDNF AAGAAAGTAAGGTCTAACCTGTTCTGTGTCT-GTCTCTGCTTCTTCCACAGCTCCACC 1610
mouse_BDNF GAGAAAGAAAGTTCTAACCTGTTCTGTGTCT-GTCTCTGCTTCTTCCACAGCTCCACC 1643
* * * * * * * * * * * * * * * * * * * * * * * * * * * * * * * * * * * * * * * *
→

human_BDNF AGGTGAGAAGAGTGATGACCATCCTTTTCTTACTATGGTTATTTTCATACTTTGGTTGCA 1822
rat_BDNF AGGTGAGAAGAGTGATGACCATCCTTTTCTTACTATGGTTATTTTCATACTTCGGTTGCA 1670
mouse_BDNF AGGTGAGAAGAGTGATGACCATCCTTTTCTTACTATGGTTATTTTCATACTTCGGTTGCA 1703
* * * * * * * * * * * * * * * * * * * * * * * * * * * * * * * * * * * * * * * *

human_BDNF TGAAGGCTGCCCCATGAAAGAAGCAAACATCCGAGGACAAGGTGGCTTGGCCTACCCAG 1882
rat_BDNF TGAAGGCTGCCCCATGAAAGAAGCAAACGTCCACGGACAAGGCAACTTGGCCTACCCAG 1730
mouse_BDNF TGAAGGCGGCGCCATGAAAGAAGTAAACGTCCACGGACAAGGCAACATGGCCTACCCAG 1763
* * * * * * * * * * * * * * * * * * * * * * * * * * * * * * * * * * * * * * * *

human_BDNF GTGTGCGGACCCATGGGACTCTGGAGAGCGTGAATGGGCCAAGGCAGGTTCAAGAGGCT 1942
rat_BDNF CTGTGCGGACCCATGGGACTCTGGAGAGCGTGAATGGGCCAAGGCAGGTTTCGAGAGGTC 1790
mouse_BDNF GTGTGCGGACCCATGGGACTCTGGAGAGCGTGAATGGGCCAAGGCAGGTTTCGAGAGGTC 1823
* * * * * * * * * * * * * * * * * * * * * * * * * * * * * * * * * * * * * * * *

human_BDNF TGAC-----ATCATTGGCTGACACTTTCGAACACGTGATAGAAGAGCTGTTGGATGAGG 1996
rat_BDNF TGACGACGACGTCCCTGGCTGACACTTTTGACACGTGATCGAAGAGCTGCTGGATGAGG 1850
mouse_BDNF TGACGACGACATCACTGGCTGACACTTTTGACACGTGATCGAAGAGCTGCTGGATGAGG 1883
* * * * * * * * * * * * * * * * * * * * * * * * * * * * * * * * * * * * * * * *

human_BDNF ACCAGAAAGTTCGGCCCAATGAAGAAAACAATAAGGACGCAGACTTGTACACGTCAGGG 2056
rat_BDNF ACCAGAAGTTCGGCCCAACGAAGAAAACCATAAGGACGCAGACTTGTACACTTCCCGGG 1910
mouse_BDNF ACCAGAAGTTCGGCCCAACGAAGAAAACCATAAGGACGCAGACTTGTACACTTCCCGGG 1943
* * * * * * * * * * * * * * * * * * * * * * * * * * * * * * * * * * * * * * * *

human_BDNF TGATGCTCAGTAGTCAAGTGCCCTTTGGAGCCTCCTCTTCTCTTCTGCTGGAGGAATACA 2116
rat_BDNF TGATGCTCAGCAGTCAAGTGCCCTTTGGAGCCTCCTCTGCTCTTCTGCTGGAGGAATACA 1970
mouse_BDNF TGATGCTCAGCAGTCAAGTGCCCTTTGGAGCCTCCTCTACTCTTCTGCTGGAGGAATACA 2003
* * * * * * * * * * * * * * * * * * * * * * * * * * * * * * * * * * * * * * * *

human_BDNF AAAATTACCTAGATGCTGCAAAACATGTCCATGAGGGTCCGGCGCCACTCTGACCTGCC 2176

```

**EXON IX**

|            |                                                                         |      |
|------------|-------------------------------------------------------------------------|------|
| rat_BDNF   | <b>AAAATTACCTGGATGCCGCAACATGTCTATGAGGGTTTCGGCGCCACTCCGACCCCGCCC</b>     | 2030 |
| mouse_BDNF | AAAATTACCTGGATGCCGCAACATGTCTATGAGGGTTTCGGCGCCACTCCGACCCCTGCC<br>*****   | 2063 |
| human_BDNF | <b>GCCGAGGGGAGCTGAGCGTGTGTGACAGTATTAGTGAGTGGGTAACGGCGGCAGACAAAA</b>     | 2236 |
| rat_BDNF   | GCCGTGGGGAGCTGAGCGTGTGTGACAGTATTAGCGAGTGGGTACAGCGGCAGATAAAA             | 2090 |
| mouse_BDNF | GCCGTGGGGAGCTGAGCGTGTGTGACAGTATTAGCGAGTGGGTACAGCGGCAGATAAAA<br>****     | 2123 |
| human_BDNF | <b>AGACTGCAGTGGACATGTCTGGCGGGACGGTCACAGTCCCTGAAAAGGTCCTGTATCAA</b>      | 2296 |
| rat_BDNF   | AGACTGCAGTGGACATGTCTGGCGGGACGGTCACAGTCCCTGGAGAAAAGTCCCGGTATCAA          | 2150 |
| mouse_BDNF | AGACTGCAGTGGACATGTCTGGCGGGACGGTCACAGTCCCTAGAGAAAAGTCCCGGTATCCA<br>***** | 2183 |
| human_BDNF | <b>AAGGCCAACTGAAGCAATACTTCTACGAGACCAAGTGCAATCCCATGGGTTACACAAAAG</b>     | 2356 |
| rat_BDNF   | AAGGCCAACTGAAGCAATACTTCTACGAGACCAAGTGTAATCCCATGGGTTACACGAAGG            | 2210 |
| mouse_BDNF | AAGGCCAACTGAAGCAGTATTCTACGAGACCAAGTGTAATCCCATGGGTTACACCAAGG<br>*****    | 2243 |
| human_BDNF | <b>AAGGCTGCAGGGGCATAGACAAAAGGCATTGGAAGTCCAGTGCCGAAGTACCCAGTCGT</b>      | 2416 |
| rat_BDNF   | AAGGCTGCAGGGGCATAGACAAAAGGCATTGGAAGTCCAGTCCGAAGTACCCAAATCGT             | 2270 |
| mouse_BDNF | AAGGCTGCAGGGGCATAGACAAAAGGCATTGGAAGTCCGAAGTACCCAAATCGT<br>*****         | 2303 |
| human_BDNF | <b>ACGTGCGGGCCCTTACCATGGATAGCAAAAAGAGAATTGGCTGGCGATTTCATAAGGATAG</b>    | 2476 |
| rat_BDNF   | ATGTTCCGGGCCCTTACTATGGATAGCAAAAAGAGAATTGGCTGGCGATTTCATAAGGATAG          | 2330 |
| mouse_BDNF | ATGTTCCGGGCCCTTACTATGGATAGCAAAAAGAGAATTGGCTGGCGATTTCATAAGGATAG<br>* * * | 2363 |
| human_BDNF | <b>ACACTTCTGTGTATGTACATTGACCATTAAAAGGGGAAGATAGTGGATTTATGTTGTAT</b>      | 2536 |
| rat_BDNF   | ACACTTCTGTGTATGTACACTGACCATTAAAAGGGGAAGATAGTGGATTTATGTTGTAT             | 2390 |
| mouse_BDNF | ACACTTCTGTGTATGTACACTGACCATTAAAAGGGGAAGATAGTGGATTTATGTTGTAT<br>*****    | 2423 |
| human_BDNF | <b>AGATTAGATTATATTGAGACAAAAATTATCTATTTGTATATATACATAACAGGGTAAATT</b>     | 2596 |
| rat_BDNF   | AGATTA----TATTGAGACAAAAATTATCTATTTGTATATATACATAACAGGGTAAATT             | 2445 |
| mouse_BDNF | AGATTA----TATTGAGACAAA--TTATCTATTTGTATATATACATAACAGGGTAAATT<br>*****    | 2477 |
| human_BDNF | <b>ATTAGTTAAGAAAAAATAATTTTATGAACTGCATGTATAAATGAAGTTTATACAGTAC</b>       | 2656 |
| rat_BDNF   | ATTAGTTAAGAAAAAGATAATTTTATGAACTGCATGTATAAATGAAGTTTATACAGTAC             | 2505 |
| mouse_BDNF | ATTAGTTAAGAAAA--ATAATTTTATGAACTGCATGTATAAATGAAGTTTATACAGTAC<br>*****    | 2536 |
| human_BDNF | <b>AGTGGTTCACAATCTATTTATGGACATGTCCATGACCAGAAAGGAAACAGTCATTTGC</b>       | 2716 |
| rat_BDNF   | AGTGGTTCACAATCTATTTATGGACATATCCATGACCAGAAAG--AAACAGTCATTTGC             | 2564 |
| mouse_BDNF | AGTGGTTCACAATCTATTTATGGACATATCCATGACCTGAAAGGAAACAGTCATTTGC<br>*****     | 2596 |
| human_BDNF | <b>GCACAACTTAAAAGTCTGCATTACATTCCTCGATAATGTTGTGGTTTGTGCGGTTGCC</b>       | 2776 |
| rat_BDNF   | GCACAACTTAAAAGTCTGCATTACATTCCTCGATAATGTTGTGGTTTGTGCGGTTGCC              | 2624 |
| mouse_BDNF | GCACAACTTAAAAGTCTGCATTACATTCCTCGATAATGTTGTGGTTTGTGCGGTTGCC<br>*****     | 2656 |
| human_BDNF | <b>AAGAAGTGAACATAAAAAGTTAAAAA---TAATAAATGTCATGCTGCTTTAATT</b>           | 2832 |
| rat_BDNF   | AAGAATTGAAACA--AAAAGTTAAAAA---TAATAAATGTCATGCTGCTTTAATT                 | 2678 |
| mouse_BDNF | AAGAATTGAAACA--AAAAGTTAAAAAATAATAATAAATGTCATGCTGCTTTAATT<br>*****       | 2714 |
| human_BDNF | <b>GTGAATTGATAATAAACTGTCC-TCTTTCAGAAAACAG---AAAAACACACA-CACAC</b>       | 2887 |
| rat_BDNF   | GTGAATTGATAATAAACTGTCCCTCTTTCAGAAAACAGAC-AAAAAACAAAAACAAAA              | 2737 |
| mouse_BDNF | GTGAATTGATAATAAACTGTCCCTCTTTCAGAAAACAGATTAATAAATAAATAAATAA<br>*****     | 2774 |
| human_BDNF | <b>A-----CAACAAAATTTGAACCAAAACATTCCGTTTACATTTTAGACA</b>                 | 2931 |
| rat_BDNF   | A-----AAAGCAAAAACAAAATTTGAACCAAAACATTCCGTTTACATTTTAGACA                 | 2788 |
| mouse_BDNF | AAAAAACAAAAACAAAACAAAATTTGAACCAAAACATTCCGTTTACATTTTAGACA<br>* *****     | 2834 |

|            |                                                                      |      |
|------------|----------------------------------------------------------------------|------|
| human_BDNF | <b>GTAAGTATCTTCGTTCTTGTAGTACTATATCTGTTTTACTGCTTTTAACTTCTGATAGC</b>   | 2991 |
| rat_BDNF   | CTAAGTATCTTCGTTCTTGTAGTACT----CTGTTCTACTGCTTTCAACTTCTCATAGC          | 2844 |
| mouse_BDNF | CTAAGTATCTTCGTTCTTGTAGTACT----CTGTTTTACTGCTTTCGACTTCTGATAGC          | 2890 |
|            | *****                                                                |      |
| human_BDNF | <b>GTTGGAATTAACAATGTCAAGGTGCTGTTGTCATTGCTTTACTGGCTTAGGGGATGGG</b>    | 3051 |
| rat_BDNF   | GTTGGAATTAACACTATGTCAAGGTGCTGTTGTCATTGCTTTACTGGCTTAGGGGATGGG         | 2904 |
| mouse_BDNF | GTTGGAATTAACAATGTCAAGGTGCTGTTGTCATTGCTTTACTGGCGTAAGGGACGGG           | 2950 |
|            | *****                                                                |      |
| human_BDNF | <b>GGATGGG--GGGTATATTTTTGTTTGTGTTTTTTTTT---TCGTTTGTGTTTTG</b>        | 3106 |
| rat_BDNF   | GAACGGGAGGGGTAGATTTCTGTTTGTGTTTTATTTCTGTTTGTGTTTTGTTTTG              | 2964 |
| mouse_BDNF | GAATGGGAGGGGTAGATTTCTGTTTGTGTTTTGTTTATTTGTTTGTGTTTTGTTTTG            | 3010 |
|            | * * * * *                                                            |      |
| human_BDNF | <b>TTTTTTAGTCCACAGGGAGTAGAGATGGGAAAGAATCCTACAATATATATCTGGC</b>       | 3166 |
| rat_BDNF   | TTTTTTTAGTCCACCCGGAGTAGGGATGGAGAAA--ATTTCTTCACTCTCCATTCTGGT          | 3022 |
| mouse_BDNF | TTTTTT-AGTCCACCCGGAGTAGGGATGGAGAAA--ATTTCTTCACTATCCATTCTGGT          | 3067 |
|            | *****                                                                |      |
| human_BDNF | <b>TGATAAAA-GATACATTTGTATGTTGTAAGA-TGTTTGCAATATC-GATCAGATGACTA</b>   | 3223 |
| rat_BDNF   | TGATAAAGCGTTACATTTGTATGTTGTAAGAAAATGTTTGCAAAATCCAATCAGATGACTG        | 3082 |
| mouse_BDNF | TGATAAAGCGTTACATTTGTATGTTGTAAGA-TGTTTGCAAAATCCAATCAGATGACTG          | 3126 |
|            | *****                                                                |      |
| human_BDNF | <b>GAAAGTGAATAAAAATTAAGGCAACTGAACAAAAAATGCTCACACTCCACATCCCGTGA</b>   | 3283 |
| rat_BDNF   | GAAAACGAATAAAAATTAAGGCAACTGAATAAAA--TGCTCACACAACACTGCCCATGA          | 3139 |
| mouse_BDNF | GAAAACAAATAAAAATTAAGGCAACTGAATAAAA--TGCTCACACTCCACTGCCCATGA          | 3183 |
|            | ****                                                                 |      |
| human_BDNF | <b>TGCACCTCCAGGCC--GCTCATTCTTTGGGCGTTGGTCAGAGTAAGCTGCTTTT</b>        | 3338 |
| rat_BDNF   | TGTATCTCCCTGGTCCCC--AGGTCACCTCTTCTGGCATGGGTCAGGGAAAGCTGCTTTT         | 3197 |
| mouse_BDNF | TGTATCTCCCTGGTCCCCCTCAGCTCCTTCTGGCATGGGTCAGGGAAATGCTTTT              | 3243 |
|            | ** * * * *                                                           |      |
| human_BDNF | <b>GACGGAAGGACCTATGTTTGTTCAGAACACATCTTTCCCCCCTCCCC--TCTGGTC</b>      | 3395 |
| rat_BDNF   | ATTGGAAAGACCAGCATTGTTTAAAGCACATCTTTCCCTCCCTCCTCCCATTTGGTC            | 3257 |
| mouse_BDNF | ATTGGAAAGACCAGCATTGTTCAAAGCATACTCTTTCCCTCCCTCCTCCCATTTGGTC           | 3303 |
|            | ****                                                                 |      |
| human_BDNF | <b>TCCTC---TTTGTGTTTTTAAGGAAGAAAAATCAGTTGCGCGTTCTGAAATATTTTA</b>     | 3451 |
| rat_BDNF   | CCTTCTTTTTTGTGTTTTAAGAAAGAAAAATTAAGTTGCGCGCTTTGAAATATTTTA            | 3317 |
| mouse_BDNF | CCTTC--TTTTGTTTTGTTTTAAGAAAGAAAAATTAAGTTGCGCGCTTTAAATATTTTA          | 3361 |
|            | * * *                                                                |      |
| human_BDNF | <b>CCACTGCTGTGAACAAGTGAACACATTGTGTACATCATGACTCGTATAAGCATGGAG</b>     | 3511 |
| rat_BDNF   | TCACTGCTGTGAACAGATGAACAATGTGTGTCAATTCATGACTC-----GTGGAA              | 3369 |
| mouse_BDNF | CTACTGCTACAAACAGATGAACAATGTGTGTCAATTTATGACTC-----ATGGAA              | 3413 |
|            | *****                                                                |      |
| human_BDNF | <b>AACAGTGATTTTTTTTAGA----ACAGAAAAACAACAAAAATAACCCCAAATGAAGA</b>     | 3566 |
| rat_BDNF   | AACAGTGATTTTTTTTTTATTTTTGCCCCAAGGAGAAACAAGTAAGAATAACCGAAAAT          | 3429 |
| mouse_BDNF | AACAGTGATTTTTTTTTT-----ACCCTAAGAAAAACAATAAAAAATAACCCCAAAT            | 3465 |
|            | *****                                                                |      |
| human_BDNF | <b>TTATTTTTTATGAGGAGTGAACATTTGGGTAATCATGGCTAAGCTTAAAAAAAACAT</b>     | 3626 |
| rat_BDNF   | GTTCTTTTTTTTTAAAG-----GCATAAACAGTGGATAAGTT-----AT                    | 3468 |
| mouse_BDNF | ATTCTTTTTTTA-AAAG-----GCATAAATATTGGGTAATTT-----GT                    | 3503 |
|            | * * * * *                                                            |      |
| human_BDNF | <b>GGTGAGGCTTAACAATGTCTTGTAAAGCAAAAGGTAGAGCCCTGTATCAACCCAGAAACAC</b> | 3686 |
| rat_BDNF   | AATATGGCCTAACAAATGT-TTGCAGATAAAAGATA-----TTGCATACAGCCAGA--TAC        | 3520 |
| mouse_BDNF | AATATGGCCTAACAGTGT-TTGCAGATAAAAGTTA-----TTGTATACACCCAGA--TAC         | 3555 |
|            | * * * * *                                                            |      |
| human_BDNF | <b>CTAGATCAGAACAGGAATCCACATTGCCAGTGACATGAGACTGAACAGCCAAATGGAGGC</b>  | 3746 |
| rat_BDNF   | T-----AGAGCAGGGATCCCACTGCCACTGAAATGCGACTGAATGGCCCTGTGGAGGC           | 3574 |



|            |                                                                      |               |      |
|------------|----------------------------------------------------------------------|---------------|------|
| human_BDNF | <b>CATTAGCCATTTCACACCTGAAAATGTTAGTGATCAC-CACTTGGACC---</b>           | <b>AGCATC</b> | 4571 |
| rat_BDNF   | --TGAGGTTTTCCGCCAGCGCAATGTGTTAGTGGTTACCTGACTGGGCTCCTGGGCATC          |               | 4379 |
| mouse_BDNF | --TCAGGTTTTTTCAAGCGTGAATGTGTTAGTGGTTACTCTCCTGGGTTCTGAGCATC           |               | 4408 |
|            | * * * * *                                                            |               |      |
| human_BDNF | <b>CTTAAGTATCAGAAAGCCCCAAGCAATTGCTGCATCTTAGTAGGGTGAGGGATAAGCAAA</b>  |               | 4631 |
| rat_BDNF   | AGAAAA-----GAGGCAAACAATTGCTTCATCTTAGGAGTGGAAAGGGTGAACAA              |               | 4431 |
| mouse_BDNF | AGAAAAAAAAAAAAAGAGGCAAACAATCGCTTCATCTTAGGAGTGGAAAGGA--AACAGA         |               | 4466 |
|            | ** * * * *                                                           |               |      |
| human_BDNF | <b>AGAGGATGTTCAACATAACCCAGG-AATGAAGATACCATCAGCAAAGAATTTCAATTT-G</b>  |               | 4689 |
| rat_BDNF   | AGTGGCTGTCCACTGTGACTCAGGGAGTGAAGATACCATCAGCAAATAGTTTCTTTTT-G         |               | 4490 |
| mouse_BDNF | AGTGGACGTCCGCTGTGACTCAGGGAGTGAAGATACCATCAGCAAATAGTTTCTTTTTG          |               | 4526 |
|            | ** * * * *                                                           |               |      |
| human_BDNF | <b>TTCAGTCTTTCATTTAGAGCTA---GTCTTTCACAGTACCATCTGAATACCTCTTTGAA</b>   |               | 4745 |
| rat_BDNF   | TTCAACTGTTCCCTTTAGAACTAGTCTGTCTTCTGGAGTCCCA-CTGAATCCCTGTTTTT         |               | 4549 |
| mouse_BDNF | TTCAATTCGTTCCCTTTGAGTTAGCCTGTCTTTTGGAAATACCA-CTGAATATGTGTTTTT        |               | 4585 |
|            | **** * * * * *                                                       |               |      |
| human_BDNF | <b>AGAAGGAAGACTTTACGTAGTGTAGATTTGTTTGTGTTGTTGAAAATATTA-TCITTTG</b>   |               | 4804 |
| rat_BDNF   | ----GGAAGACTTCACGTAGCCTAGATT-GTTTTGTGCCGTTTGACAACATTAATCTCTG         |               | 4604 |
| mouse_BDNF | ----GAAAGACTTCATGTAGCATAGATT-GTTTTGTGCCGTTTACCAA-ATTAACCTTTG         |               | 4639 |
|            | * * * * *                                                            |               |      |
| human_BDNF | <b>TAATTATTTTT-AATATGT-AAGGAATGCTTGGAAATATCTGCTATATGTCAACTTTATGC</b> |               | 4862 |
| rat_BDNF   | TCATCATTTTT-AACCTATTAAGGAATGCTTGAATATCTGCTATATGTCAACTTTTTC           |               | 4663 |
| mouse_BDNF | TCATCGTTTTTTAACCTATTGAGGAATGCTTGGAAATATCTGCTATATGTCAACTTTTTC         |               | 4699 |
|            | * * * * *                                                            |               |      |
| human_BDNF | <b>AGCTTCCTTTTGAGGGACAAATTTAAACAACAAC-CCCCATCACAAACTTAAAG</b>        |               | 4918 |
| rat_BDNF   | AGCTTCATTTCTGAGAGACGTTAGTCAAACAATAAAAGGAGCCCATCACAACTCACGG           |               | 4723 |
| mouse_BDNF | AGCTTCATTTCTGAGAGACATTAGTCAAACAACAAGGATCCCATCACAACTTACAG             |               | 4759 |
|            | ***** * * * * *                                                      |               |      |
| human_BDNF | <b>GATTGCAAGGGCCAGATCTGTTAAGTGGTTTCATAGGAGACACATCCAGCAATGTGTGG</b>   |               | 4978 |
| rat_BDNF   | TATTGCAAGGGCCAGGTCGATTAGGTGGCTTATAGGAGACCC--TCCGCAACTGTGTGG          |               | 4781 |
| mouse_BDNF | TACTGCAAGGGCCAGGTCGTTAAGCGGCTTACAGGAGACA--TCAGCAATGTGTGG             |               | 4816 |
|            | * * * * *                                                            |               |      |
| human_BDNF | <b>TCAGTGG---CTCTTTTACCCAATAAGATACATCACAGTCACATGCTTGATGGTTTATG</b>   |               | 5034 |
| rat_BDNF   | TCAGTGGCTGGCTCTCATACCCACTAAGATACATCATAGCTCCATG-TCGGTGGTTTATG         |               | 4840 |
| mouse_BDNF | TCAGTGGCTGGCTCTCTTACCCACTAAGATACATCATAGCTACATG-TTGGTGGTTTATG         |               | 4875 |
|            | ***** * * * * *                                                      |               |      |
| human_BDNF | <b>TTGACCTAAGATTTATTTGTTAAATCTCT-CTCTGTTG-TGTTGCTTCT-----</b>        |               | 5083 |
| rat_BDNF   | TTGACCTGAGATTGATTT-GTTAAATCTCTCTCTGTTTCTGTTCTGTTCTGTTCCGTC           |               | 4899 |
| mouse_BDNF | TTGACCTGAGATTATTT-GTTAAATCTCTCTCTGTTTCTGTTCTGTTCTGTTCTGTT            |               | 4934 |
|            | ***** * * * * *                                                      |               |      |
| human_BDNF | <b>-TGTTCTGTTTGTGTTTTGTTTTT---TAAAGTCTTGCTGTGGTCTCTTTGTGGCAGAAG</b>  |               | 5138 |
| rat_BDNF   | CTGTTCTGTTCTGTTCTGTTCTG---AAAGTCTTGCTGTGGTCTCTTTTGGCAGAAG            |               | 4954 |
| mouse_BDNF | CTGTTCTGTTCTGTTCTGTTTTGTTTTAAAGTCTTGCTGTGGTCTCTGTTGGCAGAAA           |               | 4994 |
|            | ***** * * * * *                                                      |               |      |
| human_BDNF | <b>TGTTTCATGCATGGCAGCAGCCTGTTGCTTTTTTATGGCGATCCCATTGAAAATGTAA</b>    |               | 5198 |
| rat_BDNF   | TGTTTCATGCATGGCAGCAGCCTGATGCTTTTT-ATAGTGATTCCCATTGAAACTGTAA          |               | 5013 |
| mouse_BDNF | TGTTTTATGCATGGCAGCAGCCTGTTGCTTTTTTATAGTGATTCCCATTGAAACTGTAA          |               | 5054 |
|            | ***** * * * * *                                                      |               |      |
| human_BDNF | <b>GTAATGTCTGTGGCCTGTTCTCTCTATGGTAAAGATATTATTCACCATGTAAAACAAA</b>    |               | 5258 |
| rat_BDNF   | GTAATGTCTGTGGCCTGTTCTCTCTATGGTAAAGATATTATTCACCATGTAAAACAAG           |               | 5073 |
| mouse_BDNF | GTAATGTCTGTGGCCTGTTCTCTCTATGGTAAAGATATTATTCACCATGTAAAACAAG           |               | 5114 |
|            | ***** * * * * *                                                      |               |      |
| human_BDNF | <b>AAACAATATTTATTGTATTTTAGTATATTTATATAATTATGTTATTGAAAAAATTGGCA</b>   |               | 5318 |
| rat_BDNF   | AAAAA-TATTTATTGTATTTTAGTATATTTATATAATTATGTTATTGAAAAAATTGGCA          |               | 5132 |
| mouse_BDNF | AAAAAATATTTATTGTATTTTAGTATATTTATATAATTATGTTATTGAAAAA-TTGGCA          |               | 5173 |

\*\*\* \* \*\*\*\*\*

human\_BDNF **TTAAAACTTAACCGCATCAGAA-CCTATTGTAAATACAAGTTCTATTTAAGTGTACTAAT** 5377  
rat\_BDNF **TTAAAACTTAACCGCATCAGAAAGCCTATTGTAAATACAAGTTCTATTTAAGTGTACCAAT** 5192  
mouse\_BDNF **TTAAAACTTAACCACATCAGAAAGCCTATTGTAAATACAAGTTCTATTTAAGTGTACCAAT** 5233  
\*\*\*\*\*

human\_BDNF **TAACATATAATATATGTTTTAAATATAGAATTTTTAATGTTTTAAATATATTTTCAAAG** 5437  
rat\_BDNF **TAACATATAATATATGTTTTAAATATAGAATTTTTAATGTTTTAAATATATTTTCAAAG** 5252  
mouse\_BDNF **TAACATATAATATATGTTTTAAATATAGAATTTTTAATGTTTTAAATATATTTTCAAAG** 5293  
\*\*\*\*\*

human\_BDNF **TACATAAAATCTGGGGTTCCTGGGTTTTTTCTCTTTACTGTAAAACAAACATGAAAACG** 5497  
rat\_BDNF **TACATAAAATCTGGGGTTCCTGGGTTTTTT-CTCTTCACTGTAAAATA---TGAAAATG** 5307  
mouse\_BDNF **TACATAAAGTCTGGGGTTCCTGGGTTTTTT-CTCTTCACTGTAAAATA---TGAAAATG** 5348  
\*\*\*\*\*

human\_BDNF **TGTTTTATTATAAAATACGTGTGTTCTTGCTTT** 5530  
rat\_BDNF **TGTTTTATTATAAAATACATGTGTTCTTGCTTT** 5340  
mouse\_BDNF **TGTTTCATTATAAAATACATGTGTTCTTGCTTT** 5381  
\*\*\*\*\*
